# Supplementary material
Source: publisher figshare collection journal article supplement (https://tandf.figshare.com/articles/dataset/_/11302394)
Supplement: Supplementary file 1 [file 1]

Supplementary Table S2. Scores of MD and MP of each surgeon to each member of the Habsburg family. Philip II, Philip III, Philip

IV included missing data. The Queens were evaluated by an additional investigator.

| King/Queen           |    | S1    | S2    | S3    | S4    | S5    | S6    | S7    | S8    | S9    | S10   | S11   | Average |
|----------------------|----|-------|-------|-------|-------|-------|-------|-------|-------|-------|-------|-------|---------|
| Maximilian I         | MD | 5.400 | 8.600 | 6.000 | 5.600 | 4.800 | 4.000 | 6.200 | 6.000 | 3.600 | 5.200 |       | 5.540   |
|                      | MP | 1.400 | 3.200 | 2.600 | 1.400 | 1.600 | 2.200 | 1.600 | 3.800 | 1.400 | 2.800 |       | 2.200   |
| Mary of Burgundy     | MD | 3.500 | 0.750 | 2.250 | 0.750 | 2.250 | 0.250 | 0.500 | 1.000 | 1.750 | 0.750 | 1.750 | 1.409   |
|                      | MP | 1.000 | 0.750 | 2.000 | 0.500 | 1.000 | 0.500 | 0.500 | 0.500 | 1.000 | 0.500 | 1.000 | 0.841   |
| Philip I             | MD | 2.000 | 2.000 | 4.000 | 2.500 | 3.000 | 2.000 | 1.000 | 2.500 | 1.500 | 2.000 |       | 2.250   |
|                      | MP | 0.000 | 1.000 | 4.000 | 1.000 | 2.500 | 1.500 | 1.000 | 0.500 | 1.000 | 1.000 |       | 1.350   |
| Joana of Castile     | MD | 5.500 | 3.250 | 4.250 | 4.000 | 4.250 | 3.250 | 1.250 | 1.000 | 3.500 | 1.750 | 3.750 | 3.250   |
|                      | MP | 0.000 | 1.000 | 1.750 | 1.000 | 1.500 | 1.000 | 1.000 | 1.000 | 1.500 | 1.000 | 0.500 | 1.023   |
| Charles I            | MD | 6.600 | 5.600 | 5.000 | 4.200 | 7.000 | 2.600 | 6.000 | 6.400 | 4.400 | 2.400 |       | 5.020   |
|                      | MP | 5.400 | 5.600 | 4.800 | 3.000 | 2.200 | 3.400 | 6.000 | 6.600 | 4.250 | 4.800 |       | 4.605   |
| Isabella of Portugal | MD | 3.750 | 1.750 | 3.500 | 1.250 | 2.750 | 1.667 | 0.750 | 1.000 | 3.000 | 0.750 | 1.500 | 1.970   |
|                      | MP | 0.500 | 1.000 | 3.250 | 1.000 | 1.500 | 0.333 | 1.000 | 1.250 | 3.500 | 1.000 | 1.250 | 1.417   |
| Philip II            | MD | 4.600 | 3.600 | 3.600 | 1.600 | 4.600 | 3.400 | 3.000 |       | 3.400 | 1.200 |       | 3.222   |
|                      | MP | 3.800 | 5.200 | 1.800 | 2.200 | 4.000 |       | 3.000 |       | 2.600 | 1.600 |       | 3.025   |
| Elisabeth of Valois  | MD | 2.800 | 1.250 | 3.600 | 1.000 | 3.200 | 1.600 | 0.000 | 0.400 | 1.000 | 1.200 | 1.400 | 1.586   |
|                      | MP | 1.000 | 1.000 | 2.200 | 1.000 | 1.400 | 1.000 | 1.000 | 1.000 | 1.200 | 1.000 | 0.800 | 1.145   |
| Anna of Austria      | MD | 4.600 | 1.600 | 3.600 | 3.800 | 3.400 | 2.200 | 1.000 | 1.600 | 2.600 | 2.800 | 2.800 | 2.727   |
|                      | MP | 1.800 | 1.000 | 3.000 | 1.000 | 0.400 | 2.000 | 1.000 | 1.600 | 1.200 | 1.200 | 0.600 | 1.345   |
| Philip III           | MD | 5.000 | 3.000 | 3.333 | 1.000 | 6.000 | 3.000 | 1.333 | 2.000 | 3.000 | 3.333 |       | 3.100   |
|                      | MP | 2.667 | 5.000 | 3.000 | 2.000 | 3.000 |       | 2.333 | 6.000 |       | 1.333 |       | 3.167   |
| Margaret of Austria  | MD | 7.000 | 5.500 | 4.500 | 6.500 | 8.500 | 7.500 | 9.250 | 5.000 | 6.000 | 6.750 | 4.000 | 6.409   |
|                      | MP | 4.250 | 2.500 | 2.500 | 3.000 | 2.750 | 1.500 | 4.667 | 5.250 | 1.750 | 4.500 | 2.750 | 3.220   |
| Philip IV            | MD | 3.750 | 7.500 | 5.750 | 3.500 | 8.000 | 6.500 | 7.500 | 6.000 | 4.250 | 5.750 |       | 5.850   |

|                     |    |       |       |       |       |       |       |       |       |       |       |       |       |
|---------------------|----|-------|-------|-------|-------|-------|-------|-------|-------|-------|-------|-------|-------|
|                     | MP | 3.750 | 7.000 | 4.500 | 4.500 | 4.750 |       | 4.250 | 7.000 | 4.500 | 5.250 |       | 5.056 |
| Elisabeth of France | MD | 2.833 | 2.167 | 4.000 | 2.833 | 5.667 | 2.667 | 1.000 | 2.167 | 4.167 | 1.833 | 2.330 | 2.879 |
|                     | MP | 0.667 | 0.833 | 2.000 | 1.000 | 1.000 | 1.667 | 1.000 | 2.000 | 2.000 | 1.000 | 0.833 | 1.273 |
| Mariana of Austria  | MD | 2.600 | 2.600 | 3.400 | 3.800 | 3.600 | 4.400 | 6.600 | 2.400 | 3.200 | 3.800 | 2.800 | 3.564 |
|                     | MP | 1.000 | 0.800 | 2.200 | 1.000 | 1.000 | 1.667 | 2.200 | 1.800 | 1.400 | 0.800 | 1.250 | 1.374 |
| Charles II          | MD | 3.750 | 5.000 | 4.250 | 3.750 | 6.500 | 4.750 | 8.500 | 4.250 | 5.000 | 5.500 |       | 5.125 |
|                     | MP | 4.500 | 5.000 | 2.750 | 3.750 | 4.000 |       | 5.000 | 7.000 | 5.250 | 5.250 |       | 4.722 |
