# Supplementary material
Source: publisher figshare collection journal article supplement (https://tandf.figshare.com/articles/dataset/_/11302394)
Supplement: Supplementary file 2 [file 1]

Supplementary Table S1. Painters and location of the 66 portraits studied. When there is more than one painting by the same artist the number of paintings is shown in parenthesis.

| King/Queen           | Painter                     | Location                                                          |
|----------------------|-----------------------------|-------------------------------------------------------------------|
| Maximilian I         | Bernhard Strigel (2)        | Kunstmuseum, Basel; Kunsthistorisches Museum, Vienna              |
|                      | Albrecht Dürer              | Graphische Sammlung Albertina, Vienna                             |
|                      | Ambrogio de Predis (2)      | Berlin State Museum, Berlin; Kunsthistorisches Museum, Vienna     |
| Mary of Burgundy     | Michael Pacher              | Heinz Kisters Collection, Kreuzlingen                             |
|                      | Niklas Reiser (2)           | Kunsthistorisches Museum, Vienna                                  |
|                      | Master H. A. or A. H.       | Metropolitan Museum of Art, New York                              |
| Philip I             | Master Magdalen Legend      | Kunsthistorisches Museum, Vienna                                  |
|                      | Juan de Flandes             | Kunsthistorisches Museum, Vienna                                  |
| Joana of Castile     | Juan de Flandes             | Kunsthistorisches Museum, Vienna                                  |
|                      | Jacob van Laethem?          | National Museum of Sculpture, Valladolid                          |
|                      | Master Joseph Sequence      | Royal Museums of Fines Arts, Belgium                              |
|                      | Master Magdalen Legend      | Kunsthistorisches Museum, Vienna                                  |
| Charles I            | Bernard van Orley (2)       | Museum of Fine Arts, Budapest; Museum of Brou, Bourg-en-Bresse    |
|                      | Titian (2)                  | Prado Museum, Madrid; Alte Pinakothek, Munich                     |
|                      | Jakob Seisenegger           | Kunsthistorisches Museum, Vienna                                  |
| Isabella of Portugal | Titian                      | Prado Museum, Madrid                                              |
|                      | Anonymous                   | Kunsthistorisches Museum, Vienna                                  |
|                      | Peter Paul Rubens           | Collection of the Dukes of Alba, Madrid                           |
|                      | Joos van Cleve?             | National Museum of Ancient Art, Lisbon                            |
|                      | William Scrots              | National Museum, Poznan                                           |
| Philip II            | Sofonisba Anguissola        | Prado Museum, Madrid                                              |
|                      | Alonso Sánchez Coello       | Pollock House, Glasgow                                            |
|                      | Anthonis Mor (2)            | Museum of Fine Arts, Bilbao; Prado Museum, Madrid                 |
|                      | Titian                      | Prado Museum, Madrid                                              |
| Elisabeth of Valois  | Sofonisba Anguissola?       | Prado Museum, Madrid                                              |
|                      | Juan Pantoja de la Cruz     | Prado Museum, Madrid                                              |
|                      | Alonso Sánchez Coello (2)   | Várez Fisa Collection, Madrid; Kunsthistorisches Museum, Vienna   |
|                      | Anthonis Mor                | Unknown location                                                  |
| Anna of Austria      | Sofonisba Anguissola        | Prado Museum, Madrid                                              |
|                      | Alonso Sánchez Coello (3)   | Kunsthistorisches Museum, Vienna; Hunterian Art Gallery, Glasgow; |
|                      |                             | Pollock House, Glasgow                                            |
| Philip III           | Bartolomé González          | Prado Museum, Madrid                                              |
|                      | Andrés López Polanco        | Kunsthistorisches Museum, Vienna                                  |
|                      | Bartolomé González          | Prado Museum, Madrid                                              |
|                      | Juan Pantoja de la Cruz     | Prado Museum, Madrid                                              |
| Margaret of Austria  | Bartolomé González (2)      | Prado Museum, Madrid                                              |
|                      | Juan Pantoja de la Cruz (2) | Prado Museum, Madrid                                              |
| Philip IV            | Diego Velázquez (4)         | Prado Museum, Madrid                                              |
| Elisabeth of France  | Diego Velázquez (3)         | Prado Museum, Madrid; Kunsthistorisches Museum, Vienna; Private   |
|                      |                             | Collection, New York                                              |
|                      | Frans Pourbus (2)           | Prado Museum, Madrid                                              |
|                      | Rodrigo de Villandrando     | Prado Museum, Madrid                                              |
| Mariana of Austria   | Juan Carreño de Miranda     | Prado Museum, Madrid                                              |
|                      | Diego Velázquez (3)         | Prado Museum, Madrid; Thyssen-Bornemisza Collection, Madrid       |
|                      | Frans Luycks                | Prado Museum, Madrid                                              |
| Charles II           | Juan Carreño de Miranda (3) | Prado Museum, Madrid                                              |
|                      | Luca Giordano               | Prado Museum, Madrid                                              |
