# Supplementary material
Source: publisher figshare collection journal article supplement (https://tandf.figshare.com/articles/dataset/_/11302394)
Supplement: Supplementary file 3 [file 1]

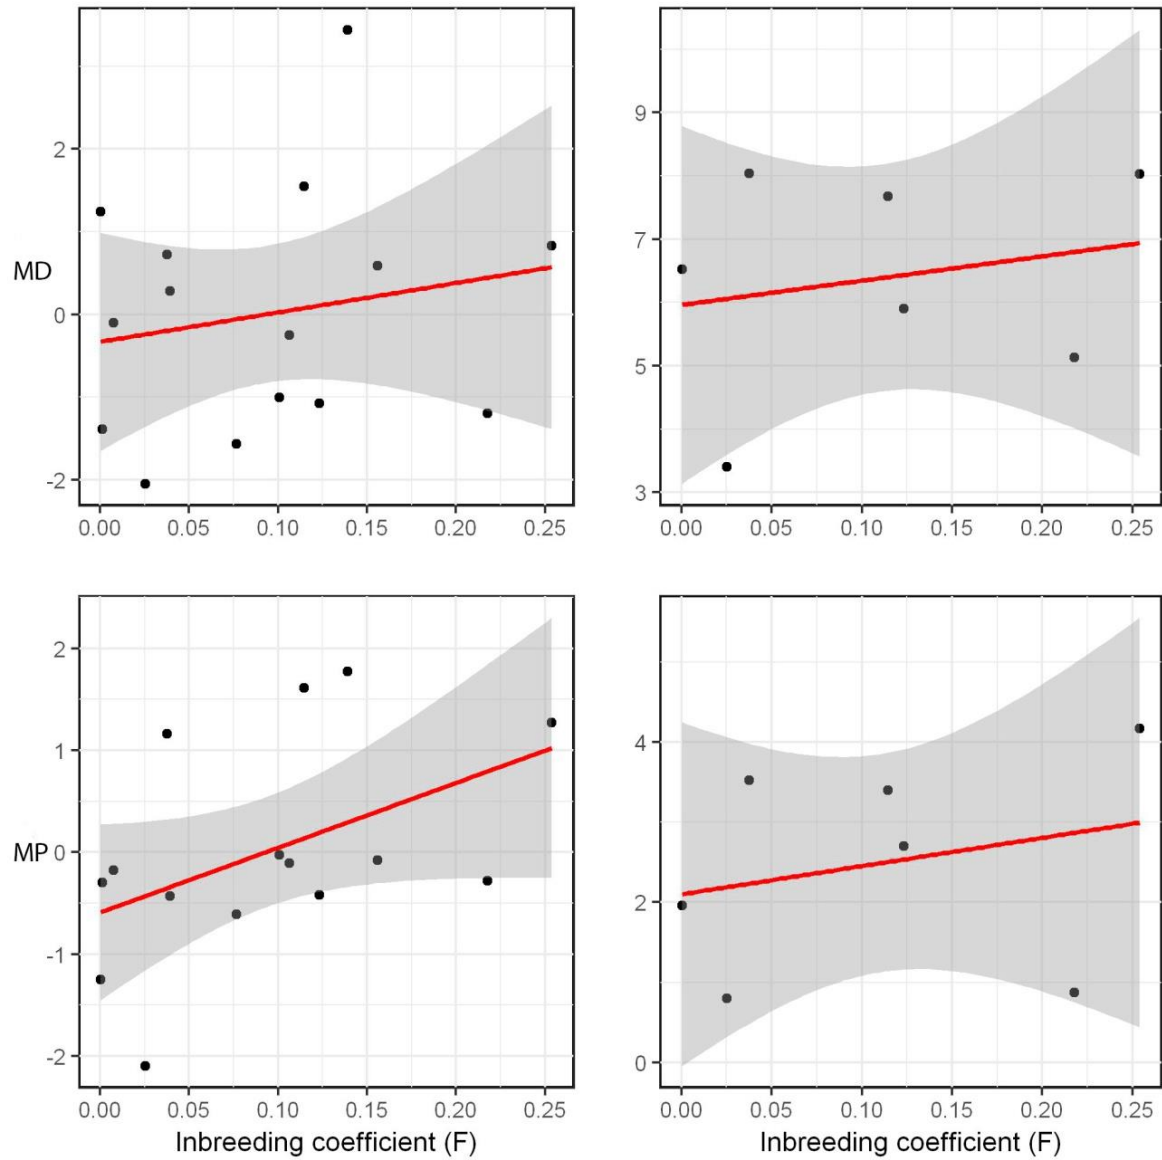

Figure S1. Scores of maxillary deficiency (MD) and mandibular prognathism (MP) from the present study (left, Habsburg kings and queens) and from Peacock et al. (2014) (right, only Habsburg kings) as a function of the inbreeding coefficient ( $F$ ). The regression lines with 95% confidence interval (shaded areas) are shown.
